# Supplementary material for: Estimating Competition between Wildlife and Humans–A Case of Cormorants and Coastal Fisheries in the Baltic Sea
Source: PLoS One. 2013 Dec 30;8(12):e83763. doi: 10.1371/journal.pone.0083763 (PMC3875482; doi:10.1371/journal.pone.0083763)
Supplement: Table S2 — Estimated daily intake of fish by cormorants at different periods over the year and number of cormorants in the two studied archipelagos. (DOCX) [file pone.0083763.s003.docx]

**Table S2**: Estimated daily intake of fish by cormorants at different periods over the year and number of cormorants in the two studied archipelagos (Kk = Karlskrona, Mn = Mönsterås). The daily intake rates during the breeding period include fish for chicks and juveniles. The number of post-breeding cormorants includes both adult and juvenile birds.

| | Period | Incubation | Small chicks | Downy chicks | Fledgings | Post-breeding | | --- | --- | --- | --- | --- | --- | | Daily intake (g) | 238 | 316 | 588 | 1080 | 540 | | Date | 1 Apr -  30 Apr | 1 May –  10 May | 11 May-  20 June | 21 June-30 Sept | 1 Oct-  31 March | | Days | 30 | 10 | 40 | 100 | 185 | | Cormorants (Kk) | 5250 | 5250 | 5250 | 5250 | 1090 | | Cormorants (Mn) | 4500 | 4500 | 4500 | 4500 | 415 | |  |  |  |  |  |  | |  |  |  |  | |  |  |  |  |
| --- | --- | --- | --- | --- | --- | --- | --- | --- | --- | --- | --- | --- | --- | --- | --- | --- | --- | --- | --- | --- | --- | --- | --- | --- | --- | --- | --- | --- | --- | --- | --- | --- | --- | --- | --- | --- | --- | --- | --- | --- | --- | --- | --- | --- | --- | --- | --- | --- | --- | --- | --- | --- |
|  |  |  |  |  |  |  |  |  |  |  |  |  |  |  |  |  |
